# Supplementary material for: TP53 Cancerous Mutations Exhibit Selection for Translation Efficiency
Source: Oxford University Press journal article supplement (doi:10.1158/0008-5472.can-09-1653), 2009-11-04
Supplement: 00085472can091653-sup-stab_4.xls [file 00085472can091653-sup-stab_4.xls]

## Sheet: TP53 GOF Mutations
Gain Of Function Mutations (taken from TP53 IARC database, "TP53MUTFunction1R13.TXT")
Codon Position	Nucleotide Position	Wild-type Nucleotide	Mutated Nucelotide	Wild-type Codon	Mutated Codon	Wild-type AA	Mutated AA	Gain of Function	PubMed
37	109	T	G	TCC	GCC	Ser	Ala	Acetylation at histone H3 K9	17891183
49	145	G	C	GAT	CAT	Asp	His	Upregulation (VEGF); VEGF production	12901974
110	329	G	T	CGT	CTT	Arg	Leu	Upregulation (GEF-H1)	16778209
124	370	T	C	TGC	CGC	Cys	Arg	p73beta interference	12917626
125	373	A	G	ACG	GCG	Thr	Ala	Upregulation (IGF-II); TA (IGF-II)	10949925
126	377	A	G	TAC	TGC	Tyr	Cys	TA (MDR-1)	11920959
126	377	A	G	TAC	TGC	Tyr	Cys	Downregulation (p21waf1); upregulation (IL-6) moderate; culture in soft agar	11920959
127	380	C	A	TCC	TAC	Ser	Tyr	p73beta interference	12917626
138	413	C	T	GCC	GTC	Ala	Val	No (growth advantage); upregulation (MRP1); upregulation (Mrp1); drug resistance	10792001
138	413	C	T	GCC	GTC	Ala	Val	TRANSF+	7761089
143	428	T	C	GTG	GCG	Val	Ala	p73 interference	10802655
143	428	T	C	GTG	GCG	Val	Ala	Extended lifespan; downregulation (WAF1, TP53)	11838964
143	428	T	C	GTG	GCG	Val	Ala	Growth advantage	8457292
143	428	T	C	GTG	GCG	Val	Ala	Growth advantage	8208534
143	428	T	C	GTG	GCG	Val	Ala	TRANSF+	2288874
143	428	T	C	GTG	GCG	Val	Ala	BLEO resistance (moderate)	7538902
143	428	T	C	GTG	GCG	Val	Ala	TRANSF+	10802655
143	428	T	C	GTG	GCG	Val	Ala	TRANSF+ (moderate)	10802655
143	428	T	C	GTG	GCG	Val	Ala	TA (MDR-1); no [TA (MRP1)]	11483599
143	428	T	C	GTG	GCG	Val	Ala	Upregulation (VEGF); VEGF production	12901974
143	428	T	C	GTG	GCG	Val	Ala	Daxx interference (weak)	12482984
143	428	T	C	GTG	GCG	Val	Ala	Rb phosphorylation; Cyclin E and cdk2 activity increase; upregulation (cdk2, cdk6); No [upregulation (Cyclin E, Cyclin D1, cdk4)]; No [downregulation (p21waf1)]	12706118
143	428	T	C	GTG	GCG	Val	Ala	No (growth advantage); downregulation (p21waf1); No (gamma-irradiation, CDDP and TOP resistance)	10585266
143	428	T	C	GTG	GCG	Val	Ala	No (growth advantage); gamma-irradiation resistance (moderate)	10585266
143	428	T	C	GTG	GCG	Val	Ala	Growth advantage; No (gamma-irradiation resistance)	10585266
143	428	T	C	GTG	GCG	Val	Ala	Growth advantage; No (gamma-irradiation resistance)	10585266
143	428	T	C	GTG	GCG	Val	Ala	Gamma-irradiation resistance	8033090
143	428	T	C	GTG	GCG	Val	Ala	CDDP, DOX and ara-C resistance; No (TAX and CPT resistance)	8967975
143	428	T	C	GTG	GCG	Val	Ala	Downregulation (TCR/CD3)	10365913
143	428	T	C	GTG	GCG	Val	Ala	DOX and CDDP sensitivity	11435891
143	428	T	C	GTG	GCG	Val	Ala	Daxx binding (low); No (culture in soft agar)	12482984
143	428	T	C	GTG	GCG	Val	Ala	Daxx and Ask1 interference (weak)	12482984
143	428	T	C	GTG	GCG	Val	Ala	TR (PTGF-beta, WAF1)	17762884
143	428	T	C	GTG	GCG	Val	Ala	CDDP resistance (moderate); no (NIM, DOX, BLEO resistance)	9568097
143	428	T	C	GTG	GCG	Val	Ala	ets-1 binding	11483599
143	428	T	C	GTG	GCG	Val	Ala	TRANSF+; hsc70 binding	8458321
143	428	T	C	GTG	GCG	Val	Ala	TA (HIV)	7760842
143	428	T	C	GTG	GCG	Val	Ala	TA (HIV)	8254719
143	428	T	C	GTG	GCG	Val	Ala	hsp70 binding; TGF-beta1 resistance (moderate); TUMOR+	1557382
143	428	T	C	GTG	GCG	Val	Ala	TA (PTHrP)	11132926
143	428	T	C	GTG	GCG	Val	Ala	hsp70 binding	8062826
143	428	T	C	GTG	GCG	Val	Ala	TA (BAG-1)	10467399
143	428	T	C	GTG	GCG	Val	Ala	TA (eIF4E)	16112647
143	428	T	C	GTG	GCG	Val	Ala	RB18A inhibition	15848166
143	428	T	C	GTG	GCG	Val	Ala	TA (bFGF); No [TA (EGFR)]	8090761
143	428	T	C	GTG	GCG	Val	Ala	TA (IGFI-R)	8710868
143	428	T	C	GTG	GCG	Val	Ala	p73alpha binding	10802655
143	428	T	C	GTG	GCG	Val	Ala	p73alpha binding (low affinity)	10802655
143	428	T	C	GTG	GCG	Val	Ala	TA (ASNS, hTERT)	15077194
143	428	T	C	GTG	GCG	Val	Ala	TA (PCNA)	1356162
143	428	T	C	GTG	GCG	Val	Ala	TA (PCNA); TA (HTLV)	1356162
143	428	T	C	GTG	GCG	Val	Ala	TA (MDR-1) moderate	8099841
144	431	A	C	CAG	CCG	Gln	Pro	TRANSF+ (moderate)	10229196
150	449	C	T	ACA	ATA	Thr	Ile	TRANSF+ (moderate)	10229196
151	452	C	A	CCC	CAC	Pro	His	p73beta interference	12917626
151	452	C	A	CCC	CAC	Pro	His	p73beta interference	12917626
151	451	C	T	CCC	TCC	Pro	Ser	TA (MDR-1)	11920959
151	451	C	T	CCC	TCC	Pro	Ser	p73beta interference	12917626
151	451	C	T	CCC	TCC	Pro	Ser	p73beta interference	12917626
151	451	C	T	CCC	TCC	Pro	Ser	Downregulation (p21waf1) moderate; no (androgen-independent cell growth)	12727844
151	451	C	T	CCC	TCC	Pro	Ser	No [regulation (RLN2)]; DNAb (RLN2) moderate	16434975
151	451	C	T	CCC	TCC	Pro	Ser	Downregulation (p21waf1); No [upregulation (IL-6)]; No (culture in soft agar)	11920959
152	455	C	T	CCG	CTG	Pro	Leu	p73beta interference	12917626
152	455	C	T	CCG	CTG	Pro	Leu	p73beta interference	12917626
152	454	C	A	CCG	ACG	Pro	Thr	p73beta interference	12917626
152	454	C	A	CCG	ACG	Pro	Thr	p73beta interference	12917626
156	467	G	C	CGC	CCC	Arg	Pro	TA (HSP70); hsc70 binding	7718482
156	467	G	C	CGC	CCC	Arg	Pro	TRANSF+	7718482
156	467	G	C	CGC	CCC	Arg	Pro	p73beta interference	12917626
156	467	G	C	CGC	CCC	Arg	Pro	Reduced dependence on serum factors	9268986
157	469	G	T	GTC	TTC	Val	Phe	Upregulation (GEF-H1)	16778209
157	469	G	T	GTC	TTC	Val	Phe	TA (ASNS, hTERT)	15077194
158	472	C	T	CGC	TGC	Arg	Cys	p73beta interference	12917626
158	472	C	G	CGC	GGC	Arg	Gly	p73beta interference	12917626
158	472	C	G	CGC	GGC	Arg	Gly	TA (PTHrP)	11132926
158	473	G	A	CGC	CAC	Arg	His	TRANSF+ (moderate)	10229196
158	473	G	A	CGC	CAC	Arg	His	p73beta interference	12917626
163	487	T	A	TAC	AAC	Tyr	Asn	TRANSF+	10229196
163	487	T	A	TAC	AAC	Tyr	Asn	p73beta interference	12917626
163	488	A	G	TAC	TGC	Tyr	Cys	TA (ASNS, hTERT)	15077194
168	502	C	T	CAC	TAC	His	Tyr	p73beta interference	12917626
168	502	C	T	CAC	TAC	His	Tyr	TRANSF+	10229196
168	502	C	T	CAC	TAC	His	Tyr	No (p73 interference); CDDP resistance (weak)	12726864
172	515	T	C	GTT	GCT	Val	Ala	No (p73 interference); CDDP resistance (weak)	12726864
173	518	T	G	GTG	GGG	Val	Gly	p73beta interference	12917626
173	517	G	A	GTG	ATG	Val	Met	TRANSF+	7761089
175	524	G	A	CGC	CAC	Arg	His	Upregulation (GEF-H1)	16778209
175	524	G	A	CGC	CAC	Arg	His	TA (HPSE)	16474844
175	524	G	A	CGC	CAC	Arg	His	TA (CDC25, CCNA)	16959611
175	524	G	A	CGC	CAC	Arg	His	hsc70 binding	15911628
175	524	G	A	CGC	CAC	Arg	His	TA (NFkB2-P2)	16260623
175	524	G	A	CGC	CAC	Arg	His	RB18A inhibition	15848166
175	524	G	A	CGC	CAC	Arg	His	TA (CaM2)	15225611
175	524	G	A	CGC	CAC	Arg	His	TA (ANGPT1, EBAG-9, ITGA6, Cyclin B2, POLD2, E2F-5)	15492269
175	524	G	A	CGC	CAC	Arg	His	Mdm2 stabilization	11152666
175	524	G	A	CGC	CAC	Arg	His	MBP1 binding	10380882
175	524	G	A	CGC	CAC	Arg	His	TA (C-FOS); growth advantage	8649776
175	524	G	A	CGC	CAC	Arg	His	TA (HIV)	8254719
175	524	G	A	CGC	CAC	Arg	His	CDDP resistance (moderate); no (NIM, DOX, BLEO resistance)	9568097
175	524	G	A	CGC	CAC	Arg	His	Growth advantage	8649776
175	524	G	A	CGC	CAC	Arg	His	TRANSF+; hsc70 binding	8458321
175	524	G	A	CGC	CAC	Arg	His	TA (PTHrP)	11132926
175	524	G	A	CGC	CAC	Arg	His	TA (C-MYC)	11179471
175	524	G	A	CGC	CAC	Arg	His	TA (MDR-1)	10329187
175	524	G	A	CGC	CAC	Arg	His	hsp70 binding	8062826
175	524	G	A	CGC	CAC	Arg	His	TA (MDR-1)	8099841
175	524	G	A	CGC	CAC	Arg	His	TA (MDR-1)	11920959
175	524	G	A	CGC	CAC	Arg	His	Upregulation (dUTPase, C-MYC)	12096336
175	524	G	A	CGC	CAC	Arg	His	p63 and p73 binding; p63 and p73 interference; hsp70 binding	11238924
175	524	G	A	CGC	CAC	Arg	His	RNA pol III activation	12082526
175	524	G	A	CGC	CAC	Arg	His	TA (ASNS, hTERT); no [TA(SV40)]	15077194
175	524	G	A	CGC	CAC	Arg	His	TA (PCNA)	1356162
175	524	G	A	CGC	CAC	Arg	His	TA (PCNA); TA (CMV, RSV, HTLV)	1356162
175	524	G	A	CGC	CAC	Arg	His	p73alpha binding	10802655
175	524	G	A	CGC	CAC	Arg	His	p73alpha binding (low affinity)	10802655
175	524	G	A	CGC	CAC	Arg	His	Decrease of some differentiation markers; reduced dependence on serum factors	9268986
175	524	G	A	CGC	CAC	Arg	His	Repression of transcriptional TGF-beta1 response	17875924
175	524	G	A	CGC	CAC	Arg	His	Repression of transcriptional TGF-beta1 response; TR (TGF-betaRII)	17875924
175	524	G	A	CGC	CAC	Arg	His	Attenuation of TGF-beta1 response; downregulation (TGF-betaRII); no [downregulation (TGF-betaRI)]; DNAb (TGF-betaRII)	17875924
175	524	G	A	CGC	CAC	Arg	His	Attenuation of TGF-beta1 response; downregulation (TGF-betaRII); no [downregulation (TGF-betaRI)]	17875924
175	524	G	A	CGC	CAC	Arg	His	TR (TGF-betaRII)	17875924
175	524	G	A	CGC	CAC	Arg	His	TRANSF+	7761089
175	524	G	A	CGC	CAC	Arg	His	Enhanced TNFalpha-induced NFkappaB activity; TNFalpha resistance (partial)	17363555
175	524	G	A	CGC	CAC	Arg	His	Enhanced TNFalpha-induced NFkappaB activity; TNFalpha resistance	17363555
175	524	G	A	CGC	CAC	Arg	His	TA (HIV)	11118296
175	524	G	A	CGC	CAC	Arg	His	Culture in soft agar (moderate); No (TUMOR+)	8099841
175	524	G	A	CGC	CAC	Arg	His	Daxx interference; Ask1 interference (weak)	12482984
175	524	G	A	CGC	CAC	Arg	His	Daxx binding; culture in soft agar	12482984
175	524	G	A	CGC	CAC	Arg	His	No (p73beta interference); p73beta binding	12934108
175	524	G	A	CGC	CAC	Arg	His	X-ray radiation resistance	8564961
175	524	G	A	CGC	CAC	Arg	His	Downregulation (p21waf1); No [upregulation (IL-6)]; culture in soft agar	11920959
175	524	G	A	CGC	CAC	Arg	His	Daxx interference	12482984
175	524	G	A	CGC	CAC	Arg	His	Daxx interference	12482984
175	524	G	A	CGC	CAC	Arg	His	AG337 resistance; downregulation (CD95/Fas, FASL); No (Fas-induced APO resistance)	12763222
175	524	G	A	CGC	CAC	Arg	His	Downregulation (MST); TR (MST); ETO resistance	16170349
175	524	G	A	CGC	CAC	Arg	His	TRANSF+	10802655
175	524	G	A	CGC	CAC	Arg	His	TRANSF+ (moderate)	10802655
175	524	G	A	CGC	CAC	Arg	His	p73 binding (weak)	15077194
175	524	G	A	CGC	CAC	Arg	His	TA (MDR-1); no [TA (MRP1)]	11483599
175	524	G	A	CGC	CAC	Arg	His	Downregulation (p21waf1)	17108111
175	524	G	A	CGC	CAC	Arg	His	Downregulation (ATF3); downregulation (Atf3); cell death inhibition	17108111
175	524	G	A	CGC	CAC	Arg	His	DNAb (CCNA2, CCNB1, CCNB2, CDC2, CDC25C)	16959611
175	524	G	A	CGC	CAC	Arg	His	CDDP resistance; no (GEM, VIN, DOX and ETO resistance); p73 interference	15958617
175	524	G	A	CGC	CAC	Arg	His	CDDP resistance; no (GEM, VIN, DOX and ETO resistance); p73 interference	15958617
175	524	G	A	CGC	CAC	Arg	His	ETO resistance	16260623
175	524	G	A	CGC	CAC	Arg	His	ETO resistance	16260623
175	524	G	A	CGC	CAC	Arg	His	TRANSF+	7478555
175	524	G	A	CGC	CAC	Arg	His	p73 interference	10802655
175	524	G	A	CGC	CAC	Arg	His	Downregulation (CD95/Fas); downregulation (Fas); TR (CD95/Fas)	12944915
175	524	G	A	CGC	CAC	Arg	His	p73 interference; CDDP resistance	12726864
175	524	G	A	CGC	CAC	Arg	His	p73 interference (moderate); CDDP resistance (moderate)	12726864
175	524	G	A	CGC	CAC	Arg	His	DNAb (RLN2) moderate	16434975
175	524	G	A	CGC	CAC	Arg	His	ETO resistance	9927204
175	524	G	A	CGC	CAC	Arg	His	TR (ATF3) moderate	17108111
175	524	G	A	CGC	CAC	Arg	His	Growth advantage; TUMOR+; drug resistance	16170357
175	524	G	A	CGC	CAC	Arg	His	Growth advantage; colony formation	8080050
175	524	G	A	CGC	CAC	Arg	His	Growth advantage; colony formation (moderate)	8080050
175	524	G	A	CGC	CAC	Arg	His	p73 binding	10884390
175	524	G	A	CGC	CAC	Arg	His	p73 binding; p73 interference	10884390
175	524	G	A	CGC	CAC	Arg	His	DOX, CDDP, gamma-irradiation resistance	15578696
175	524	G	A	CGC	CAC	Arg	His	Growth advantage; colony formation; TUMOR+	8080050
175	524	G	A	CGC	CAC	Arg	His	TA (DNp63) moderate	16931914
175	524	G	A	CGC	CAC	Arg	His	TA (DNp63) moderate	16931914
175	524	G	A	CGC	CAC	Arg	His	TA (DNp63) moderate	16931914
175	524	G	A	CGC	CAC	Arg	His	TA (DNp63)	16931914
175	524	G	A	CGC	CAC	Arg	His	Upregulation (MDR-1); no [TA (hTERT)]	17344317
175	524	G	C	CGC	CCC	Arg	Pro	TA (BAG-1)	10467399
175	524	G	C	CGC	CCC	Arg	Pro	TRANSF+	8001119
176	527	G	T	TGC	TTC	Cys	Phe	Downregulation (p21waf1)	11920959
176	527	G	T	TGC	TTC	Cys	Phe	Growth advantage	11920959
176	527	G	T	TGC	TTC	Cys	Phe	TA (MDR-1)	11920959
176	527	G	A	TGC	TAC	Cys	Tyr	p73 interference; CDDP resistance (moderate)	12726864
176	527	G	A	TGC	TAC	Cys	Tyr	p73 interference (moderate); CDDP resistance (weak)	12726864
178	532	C	T	CAC	TAC	His	Tyr	No (p73 interference); CDDP resistance (weak)	12726864
179	536	A	G	CAT	CGT	His	Arg	TR (TGF-betaRII)	17875924
179	536	A	G	CAT	CGT	His	Arg	Repression of transcriptional TGF-beta1 response (moderate)	17875924
179	536	A	G	CAT	CGT	His	Arg	Repression of transcriptional TGF-beta1 response	17875924
179	536	A	G	CAT	CGT	His	Arg	p73 interference; CDDP resistance	12726864
179	536	A	G	CAT	CGT	His	Arg	p73 interference (moderate); CDDP resistance (moderate)	12726864
179	535	C	T	CAT	TAT	His	Tyr	TRANSF+	7761089
179	535	C	T	CAT	TAT	His	Tyr	Growth advantage; upregulation (CYCLIN A, CDK4); upregulation (cyclin A, cdk4)	17530187
179	535	C	T	CAT	TAT	His	Tyr	p73 interference; p73 binding; CDDP resistance	12726864
179	535	C	T	CAT	TAT	His	Tyr	p73 interference (moderate); no (p73 binding); CDDP resistance (moderate)	12726864
179	535	C	T	CAT	TAT	His	Tyr	TA (ASNS, hTERT)	15077194
179	535	C	T	CAT	TAT	His	Tyr	p63 and p73 binding	11238924
181	541	C	T	CGC	TGC	Arg	Cys	TRANSF+ (moderate)	10229196
181	541	C	T	CGC	TGC	Arg	Cys	p73beta interference	12917626
181	542	G	T	CGC	CTC	Arg	Leu	p73beta interference	12917626
181	542	G	T	CGC	CTC	Arg	Leu	TRANSF+	8001119
194	581	T	G	CTT	CGT	Leu	Arg	TA (ASNS, hTERT)	15077194
194	581	T	A	CTT	CAT	Leu	His	Decrease of some differentiation markers; reduced dependence on serum factors	9268986
194	580	C	T	CTT	TTT	Leu	Phe	p73 binding	10884390
194	580	C	T	CTT	TTT	Leu	Phe	Downregulation (GADD45); downregulation (WAF1) moderate; no [regulation (PIG3, TAp73, C-JUN)]	17344317
194	580	C	T	CTT	TTT	Leu	Phe	p38 and p42 binding	7935394
202	604	C	A	CGT	AGT	Arg	Ser	TRANSF+ (moderate)	10229196
202	604	C	A	CGT	AGT	Arg	Ser	strong TA (IGF-BP3)	10229196
205	614	A	G	TAT	TGT	Tyr	Cys	TRANSF+	7718482
205	614	A	G	TAT	TGT	Tyr	Cys	TA (HSP70); hsc70 binding	7718482
205	614	A	G	TAT	TGT	Tyr	Cys	TRANSF+	7761089
213	638	G	A	CGA	CAA	Arg	Gln	No (growth advantage; cell mobility advantage)	17636407
213	638	G	A	CGA	CAA	Arg	Gln	Growth advantage; no (colony formation)	8080050
213	638	G	A	CGA	CAA	Arg	Gln	Growth advantage (moderate); no (colony formation); TUMOR+	8080050
214	641	A	G	CAT	CGT	His	Arg	Upregulation (IL-6); culture in soft agar	11920959
214	641	A	G	CAT	CGT	His	Arg	TA (MDR-1)	11920959
215	643	A	T	AGT	TGT	Ser	Cys	TRANSF+ (moderate)	10229196
215	644	G	T	AGT	ATT	Ser	Ile	Growth advantage	17325666
219	656	C	A	CCC	CAC	Pro	His	TRANSF+ (moderate)	10229196
220	659	A	G	TAT	TGT	Tyr	Cys	p63 and p73 binding; p63 and p73 interference; hsp70 binding	11238924
220	659	A	G	TAT	TGT	Tyr	Cys	p73 interference; CDDP resistance	12726864
220	659	A	G	TAT	TGT	Tyr	Cys	p73 interference (moderate); CDDP resistance (moderate)	12726864
220	659	A	G	TAT	TGT	Tyr	Cys	Downregulation (GADD45, PTEN, PERP); no [regulation (PIG3, WAF1, TAp73, C-JUN)]; downregulation (Gadd45, Pten)	17344317
220	659	A	G	TAT	TGT	Tyr	Cys	Upregulation (stathmin)	17663418
220	658	T	C	TAT	CAT	Tyr	His	TRANSF+	7718482
220	658	T	C	TAT	CAT	Tyr	His	TA (HSP70); hsc70 binding	7718482
223	668	C	T	CCT	CTT	Pro	Leu	TA (MDR-1)	11920959
223	668	C	T	CCT	CTT	Pro	Leu	Growth advantage	11920959
223	668	C	T	CCT	CTT	Pro	Leu	Upregulation (IL-6) low; No (culture in soft agar)	11920959
224	670	G	A	GAG	AAG	Glu	Lys	p73beta interference	12917626
232	695	T	C	ATC	ACC	Ile	Thr	TRANSF+	1327751
234	701	A	G	TAC	TGC	Tyr	Cys	TRANSF+	10229196
234	700	T	C	TAC	CAC	Tyr	His	Growth advantage (moderate); colony formation (moderate); no TUMOR+	8080050
234	700	T	C	TAC	CAC	Tyr	His	Growth advantage (moderate); colony formation	8080050
234	700	T	C	TAC	CAC	Tyr	His	Growth advantage; no (colony formation)	8080050
238	712	T	C	TGT	CGT	Cys	Arg	TRANSF+ (moderate)	7478555
238	713	G	A	TGT	TAT	Cys	Tyr	TRANSF+ (moderate)	7478555
241	722	C	T	TCC	TTC	Ser	Phe	p73beta interference	12917626
242	725	G	A	TGC	TAC	Cys	Tyr	p73beta interference	12917626
242	725	G	A	TGC	TAC	Cys	Tyr	p73 interference; CDDP resistance (moderate)	12726864
242	725	G	A	TGC	TAC	Cys	Tyr	p73 interference (moderate); CDDP resistance (moderate)	12726864
245	734	G	A	GGC	GAC	Gly	Asp	p73 interference; p73 binding; CDDP resistance	12726864
245	734	G	A	GGC	GAC	Gly	Asp	p73 interference (moderate); no (p73 binding); CDDP resistance (moderate)	12726864
245	734	G	A	GGC	GAC	Gly	Asp	p73beta interference	12917626
245	734	G	A	GGC	GAC	Gly	Asp	TRANSF+ (low)	7478555
245	733	G	T	GGC	TGC	Gly	Cys	hsc70 binding (weak)	1631137
245	733	G	A	GGC	AGC	Gly	Ser	p73beta interference	12917626
245	733	G	A	GGC	AGC	Gly	Ser	p73beta interference	12917626
245	733	G	A	GGC	AGC	Gly	Ser	p73 interference; CDDP resistance	12726864
245	733	G	A	GGC	AGC	Gly	Ser	p73 interference (moderate); CDDP resistance (moderate)	12726864
245	733	G	A	GGC	AGC	Gly	Ser	Topoisomerase I and hsp70 binding; no (topoisomerase II binding); gene amplification	12036943
245	733	G	A	GGC	AGC	Gly	Ser	Upregulation (RLN2); no [regulation (H2relaxin)]	16434975
245	733	G	A	GGC	AGC	Gly	Ser	Downregulation (p21waf1) moderate; androgen-independent cell growth	12727844
245	733	G	A	GGC	AGC	Gly	Ser	TRANSF+ (low)	7478555
245	733	G	A	GGC	AGC	Gly	Ser	CDDP resistance; no (GEM, VIN, DOX and ETO resistance); p73 interference	15958617
245	733	G	A	GGC	AGC	Gly	Ser	CDDP resistance; no (GEM, VIN, DOX and ETO resistance); p73 interference	15958617
245	733	G	A	GGC	AGC	Gly	Ser	TA (MDR-1)	11920959
245	734	G	T	GGC	GTC	Gly	Val	TRANSF+	1327751
245	734	G	T	GGC	GTC	Gly	Val	p38 and p42 binding	7935394
245	734	G	T	GGC	GTC	Gly	Val	TRANSF+ (moderate)	7478555
246	736	A	G	ATG	GTG	Met	Val	TRANSF+ (moderate)	1918170
247	740	A	T	AAC	ATC	Asn	Ile	DOX and CDDP sensitivity	11435891
248	743	G	A	CGG	CAG	Arg	Gln	TA (HSP70); no (hsc70 binding)	7718482
248	743	G	A	CGG	CAG	Arg	Gln	TRANSF+	7718482
248	743	G	A	CGG	CAG	Arg	Gln	Upregulation (GEF-H1)	16778209
248	743	G	A	CGG	CAG	Arg	Gln	Growth advantage; colony formation	8080050
248	743	G	A	CGG	CAG	Arg	Gln	Growth advantage; colony formation	8080050
248	743	G	A	CGG	CAG	Arg	Gln	Growth advantage; colony formation; TUMOR+	8080050
248	743	G	A	CGG	CAG	Arg	Gln	Growth advantage	9704930
248	743	G	A	CGG	CAG	Arg	Gln	p73beta interference	12917626
248	743	G	A	CGG	CAG	Arg	Gln	p73beta interference	12917626
248	743	G	A	CGG	CAG	Arg	Gln	DOX and TAX resistance; upregulation (P-gp)	15004724
248	743	G	A	CGG	CAG	Arg	Gln	TRANSF+ (moderate)	7478555
248	743	G	A	CGG	CAG	Arg	Gln	In vitro PRIMA-1 sensitivity; No (in vivo PRIMA-1 sensitivity); No (PRIMA-1 induced reactivation)	18048389
248	742	C	G	CGG	GGG	Arg	Gly	TA (MDR-1)	11920959
248	742	C	T	CGG	TGG	Arg	Trp	TA (MDR-1)	8099841
248	742	C	T	CGG	TGG	Arg	Trp	TA (MDR-1)	11920959
248	742	C	T	CGG	TGG	Arg	Trp	Upregulation (dUTPase, C-MYC)	12096336
248	742	C	T	CGG	TGG	Arg	Trp	Upregulation (IGF-II); TA (IGF-II)	10949925
248	742	C	T	CGG	TGG	Arg	Trp	TRANSF+ (moderate)	10229196
248	742	C	T	CGG	TGG	Arg	Trp	p73alpha binding (low affinity)	10802655
248	742	C	T	CGG	TGG	Arg	Trp	p63 and p73 binding; hsp70 binding (low affinity)	11238924
248	742	C	T	CGG	TGG	Arg	Trp	TA (PCNA); TA (RSV, HTLV); no [TA(CMV)]	1356162
248	742	C	T	CGG	TGG	Arg	Trp	TA (PCNA)	1356162
248	742	C	T	CGG	TGG	Arg	Trp	TA (eIF4E)	16112647
248	742	C	T	CGG	TGG	Arg	Trp	TA (IGFI-R)	8710868
248	742	C	T	CGG	TGG	Arg	Trp	TA (BAG-1)	10467399
248	742	C	T	CGG	TGG	Arg	Trp	Mdm2 stabilization	11152666
248	742	C	T	CGG	TGG	Arg	Trp	MBP1 binding (low affinity)	10380882
248	742	C	T	CGG	TGG	Arg	Trp	TRANSF+ (moderate)	7718482
248	742	C	T	CGG	TGG	Arg	Trp	TA (C-MYC)	11179471
248	742	C	T	CGG	TGG	Arg	Trp	Growth advantage	8649776
248	742	C	T	CGG	TGG	Arg	Trp	TA (C-FOS); no (growth advantage)	8649776
248	742	C	T	CGG	TGG	Arg	Trp	p73 interference (moderate)	9891077
248	742	C	T	CGG	TGG	Arg	Trp	TA (HIV)	7760842
248	742	C	T	CGG	TGG	Arg	Trp	TA (HIV)	8254719
248	742	C	T	CGG	TGG	Arg	Trp	Repression of transcriptional TGF-beta1 response	17875924
248	742	C	T	CGG	TGG	Arg	Trp	Repression of transcriptional TGF-beta1 response	17875924
248	742	C	T	CGG	TGG	Arg	Trp	Attenuation of TGF-beta1 response; TR (TGF-betaRII)	17875924
248	742	C	T	CGG	TGG	Arg	Trp	Decrease of some differentiation markers	9268986
248	742	C	T	CGG	TGG	Arg	Trp	Heat resistance	10802378
248	742	C	T	CGG	TGG	Arg	Trp	CDDP and X-ray radiation resistance	12101396
248	742	C	T	CGG	TGG	Arg	Trp	Daxx binding (moderate); No (culture in soft agar)	12482984
248	742	C	T	CGG	TGG	Arg	Trp	Daxx interference (weak)	12482984
248	742	C	T	CGG	TGG	Arg	Trp	Mre11 binding	17417627
248	742	C	T	CGG	TGG	Arg	Trp	ATM inactivation	17417627
248	742	C	T	CGG	TGG	Arg	Trp	TRANSF+ (moderate)	7478555
248	742	C	T	CGG	TGG	Arg	Trp	TR (p53CON)	8388491
248	742	C	T	CGG	TGG	Arg	Trp	Attenuation of p21waf1 inhibitory effect	8547219
248	742	C	T	CGG	TGG	Arg	Trp	p38 and p42 binding	7935394
248	742	C	T	CGG	TGG	Arg	Trp	TRANSF+ (weak)	10802655
248	742	C	T	CGG	TGG	Arg	Trp	TRANSF+ (weak)	10802655
248	742	C	T	CGG	TGG	Arg	Trp	p73 interference; CDDP resistance	12726864
248	742	C	T	CGG	TGG	Arg	Trp	p73 interference (moderate); CDDP resistance (moderate)	12726864
248	742	C	T	CGG	TGG	Arg	Trp	CDDP resistance; no (GEM, VIN, DOX and ETO resistance); p73 interference	15958617
248	742	C	T	CGG	TGG	Arg	Trp	CDDP resistance; no (GEM, VIN, DOX and ETO resistance); p73 interference	15958617
248	742	C	T	CGG	TGG	Arg	Trp	Downregulation (ATF3); downregulation (Atf3)	17108111
248	742	C	T	CGG	TGG	Arg	Trp	TA (MDR-1); no [TA (MRP1)]	11483599
248	742	C	T	CGG	TGG	Arg	Trp	p73beta interference	12917626
248	742	C	T	CGG	TGG	Arg	Trp	Downregulation (PTHRP) moderate	8752179
248	742	C	T	CGG	TGG	Arg	Trp	ETO resistance (moderate)	9927204
248	742	C	T	CGG	TGG	Arg	Trp	TR (ATF3) moderate	17108111
248	742	C	T	CGG	TGG	Arg	Trp	Downregulation (p21waf1) moderate; androgen-independent cell growth	12727844
248	742	C	T	CGG	TGG	Arg	Trp	Upregulation (RLN2); DNAb (RLN2) moderate; no [regulation (H2relaxin)]	16434975
248	742	C	T	CGG	TGG	Arg	Trp	TR (CD95/Fas) partially	12944915
248	742	C	T	CGG	TGG	Arg	Trp	p73 interference (weak)	10802655
249	746	G	C	AGG	ACG	Arg	Thr	Upregulation (IGF-II); TA (IGF-II)	10949925
252	755	T	C	CTC	CCC	Leu	Pro	hsc70 binding	1631137
258	772	G	A	GAA	AAA	Glu	Lys	hsc70 binding	1631137
266	797	G	A	GGA	GAA	Gly	Glu	p73beta interference	12917626
266	797	G	A	GGA	GAA	Gly	Glu	p73beta interference	12917626
270	809	T	C	TTT	TCT	Phe	Ser	p73beta interference	12917626
272	815	T	C	GTG	GCG	Val	Ala	No (p73 interference); CDDP resistance (moderate)	12726864
273	817	C	T	CGT	TGT	Arg	Cys	TRANSF+	7478555
273	817	C	T	CGT	TGT	Arg	Cys	p73 interference; CDDP resistance	12726864
273	817	C	T	CGT	TGT	Arg	Cys	p73 interference (moderate); CDDP resistance (moderate)	12726864
273	817	C	T	CGT	TGT	Arg	Cys	Downregulation (p21waf1); No [upregulation (IL-6)]; culture in soft agar	11920959
273	817	C	T	CGT	TGT	Arg	Cys	p73beta interference	12917626
273	817	C	T	CGT	TGT	Arg	Cys	Resistance to chemotherapy	12726865
273	817	C	T	CGT	TGT	Arg	Cys	Upregulation (RLN2) moderate; no [regulation (H2relaxin)]	16434975
273	817	C	T	CGT	TGT	Arg	Cys	Downregulation (p21waf1) moderate; androgen-independent cell growth	12727844
273	817	C	T	CGT	TGT	Arg	Cys	TA (MDR-1)	11920959
273	817	C	T	CGT	TGT	Arg	Cys	TRANSF+	1327751
273	818	G	A	CGT	CAT	Arg	His	TA (CDC25)	16959611
273	818	G	A	CGT	CAT	Arg	His	TA (ANGPT1, EBAG-9, ITGA6, Cyclin B2, POLD2, E2F-5)	15492269
273	818	G	A	CGT	CAT	Arg	His	TA (IGFI-R)	8710868
273	818	G	A	CGT	CAT	Arg	His	TA (NFkB2-P2)	16260623
273	818	G	A	CGT	CAT	Arg	His	Mdm2 stabilization	11152666
273	818	G	A	CGT	CAT	Arg	His	MBP1 binding (low affinity)	10380882
273	818	G	A	CGT	CAT	Arg	His	TA (BAG-1)	10467399
273	818	G	A	CGT	CAT	Arg	His	TRANSF+ (moderate)	2288874
273	818	G	A	CGT	CAT	Arg	His	CDDP resistance (moderate); no (NIM, DOX, BLEO resistance)	9568097
273	818	G	A	CGT	CAT	Arg	His	No (TUMOR+); growth advantage	2274789
273	818	G	A	CGT	CAT	Arg	His	TA (C-FOS)	8649776
273	818	G	A	CGT	CAT	Arg	His	TRANSF+ (moderate); no (hsc70 binding)	8458321
273	818	G	A	CGT	CAT	Arg	His	TA (HIV)	8254719
273	818	G	A	CGT	CAT	Arg	His	TRANSF+	8001119
273	818	G	A	CGT	CAT	Arg	His	TA (ASNS, hTERT)	15077194
273	818	G	A	CGT	CAT	Arg	His	TA (PCNA)	1356162
273	818	G	A	CGT	CAT	Arg	His	TA (PCNA); TA (RSV, HTLV); no [TA(CMV, HSV1-UL9)]	1356162
273	818	G	A	CGT	CAT	Arg	His	TA (MDR-1)	8099841
273	818	G	A	CGT	CAT	Arg	His	TA (MDR-1)	11920959
273	818	G	A	CGT	CAT	Arg	His	Upregulation (C-MYC); no [upregulation (dUTPase)]	12096336
273	818	G	A	CGT	CAT	Arg	His	p63 and p73 binding	11238924
273	818	G	A	CGT	CAT	Arg	His	Downregulation (PTHRP) moderate	8752179
273	818	G	A	CGT	CAT	Arg	His	Downregulation (PTHRP)	8752179
273	818	G	A	CGT	CAT	Arg	His	Growth advantage; TUMOR+; drug resistance	16170357
273	818	G	A	CGT	CAT	Arg	His	ETO resistance (moderate)	9927204
273	818	G	A	CGT	CAT	Arg	His	TUMOR+	16723121
273	818	G	A	CGT	CAT	Arg	His	Topoisomerase I binding; gene amplification	12036943
273	818	G	A	CGT	CAT	Arg	His	Downregulation (p21waf1) moderate; androgen-independent cell growth	12727844
273	818	G	A	CGT	CAT	Arg	His	Androgen-independent TUMOR+; DNAb (RLN2); TA (RLN2)	16434975
273	818	G	A	CGT	CAT	Arg	His	Upregulation (RLN2)	16434975
273	818	G	A	CGT	CAT	Arg	His	Upregulation (Asns); DNAb (ASNS, hTERT); p73 binding (weak)	15077194
273	818	G	A	CGT	CAT	Arg	His	TR (CD95/Fas) partially	12944915
273	818	G	A	CGT	CAT	Arg	His	p73 binding	11238924
273	818	G	A	CGT	CAT	Arg	His	p73beta interference	12917626
273	818	G	A	CGT	CAT	Arg	His	p73beta interference	12917626
273	818	G	A	CGT	CAT	Arg	His	Upregulation (MDR-1)	17344317
273	818	G	A	CGT	CAT	Arg	His	TA (hTERT)	17344317
273	818	G	A	CGT	CAT	Arg	His	p38 and p42 binding; growth advantage	7935394
273	818	G	A	CGT	CAT	Arg	His	Daxx interference	12482984
273	818	G	A	CGT	CAT	Arg	His	Daxx interference	12482984
273	818	G	A	CGT	CAT	Arg	His	Mre11 binding	17417627
273	818	G	A	CGT	CAT	Arg	His	Downregulation (MSP)	16170349
273	818	G	A	CGT	CAT	Arg	His	Growth advantage	11920959
273	818	G	A	CGT	CAT	Arg	His	No (p73beta interference); p73beta binding	12934108
273	818	G	A	CGT	CAT	Arg	His	Daxx binding; culture in soft agar	12482984
273	818	G	A	CGT	CAT	Arg	His	Daxx interference; No (Ask1 interference)	12482984
273	818	G	A	CGT	CAT	Arg	His	Culture in soft agar (moderate); No (TUMOR+)	8099841
273	818	G	A	CGT	CAT	Arg	His	Constitutive topoisomerase I binding	10468612
273	818	G	A	CGT	CAT	Arg	His	TA (HIV)	11118296
273	818	G	A	CGT	CAT	Arg	His	Growth advantage	7935394
273	818	G	A	CGT	CAT	Arg	His	p38 and p42 binding; growth advantage	7935394
273	818	G	A	CGT	CAT	Arg	His	p38 and p42 binding	7935394
273	818	G	A	CGT	CAT	Arg	His	p38 and p42 binding	7935394
273	818	G	A	CGT	CAT	Arg	His	p38 and p42 binding	7935394
273	818	G	A	CGT	CAT	Arg	His	p73 interference	15958617
273	818	G	A	CGT	CAT	Arg	His	ETO resistance	16260623
273	818	G	A	CGT	CAT	Arg	His	ETO resistance	16260623
273	818	G	A	CGT	CAT	Arg	His	CDDP resistance; no (GEM, VIN, DOX and ETO resistance); p73 interference	15958617
273	818	G	A	CGT	CAT	Arg	His	CDDP resistance; no (GEM, VIN, DOX and ETO resistance); p73 interference	15958617
273	818	G	A	CGT	CAT	Arg	His	TA (MDR-1); no [TA (MRP1)]	11483599
273	818	G	A	CGT	CAT	Arg	His	TRANSF+ (moderate)	7478555
273	818	G	A	CGT	CAT	Arg	His	No (culture in soft agar or plastic, TUMOR+, TGF-beta); gamma-irradiation resistance	7624121
273	818	G	A	CGT	CAT	Arg	His	Production of some differentiation markers	9268986
273	818	G	A	CGT	CAT	Arg	His	Growth advantage; cell mobility advantage	17636407
273	818	G	A	CGT	CAT	Arg	His	Growth advantage; cell mobility advantage; downregulation (MASPIN, PAI-1, KAI1)	17636407
273	818	G	A	CGT	CAT	Arg	His	DOX and MTX resistance (partial); downregulation (procaspase-3); upregulation (procaspase-8 and 9)	17363498
273	818	G	A	CGT	CAT	Arg	His	DOX and MTX resistance; downregulation (procaspase-3); downregulation (PROCASPASE-3); upregulation (procaspase-8 and 9)	17363498
273	818	G	A	CGT	CAT	Arg	His	Repression of transcriptional TGF-beta1 response	17875924
273	818	G	A	CGT	CAT	Arg	His	Repression of transcriptional TGF-beta1 response	17875924
273	818	G	A	CGT	CAT	Arg	His	TR (PAI-1)	7479001
273	818	G	A	CGT	CAT	Arg	His	TR (PAI-1) moderate	7479001
273	818	G	T	CGT	CTT	Arg	Leu	TA (C-FOS)	8649776
273	818	G	C	CGT	CCT	Arg	Pro	p73 interference (weak)	10802655
273	818	G	C	CGT	CCT	Arg	Pro	TRANSF+ (moderate)	10802655
273	818	G	C	CGT	CCT	Arg	Pro	TRANSF+ (moderate)	10802655
273	818	G	C	CGT	CCT	Arg	Pro	TA (C-FOS); no (growth advantage)	8649776
273	818	G	C	CGT	CCT	Arg	Pro	Growth advantage	8649776
273	818	G	C	CGT	CCT	Arg	Pro	hsp70 binding	8062826
273	817	C	A	CGT	AGT	Arg	Ser	p73beta interference	12917626
274	820	G	T	GTT	TTT	Val	Phe	TA (MDR-1)	11920959
274	820	G	T	GTT	TTT	Val	Phe	Downregulation (p21waf1); upregulation (IL-6) low; culture in soft agar	11920959
275	824	G	T	TGT	TTT	Cys	Phe	p73beta interference	12917626
275	824	G	A	TGT	TAT	Cys	Tyr	TRANSF+; hsc70 binding	8458321
275	824	G	A	TGT	TAT	Cys	Tyr	No (p73 interference); CDDP resistance (weak)	12726864
279	836	G	A	GGG	GAG	Gly	Glu	p73beta interference	12917626
279	836	G	T	GGG	GTG	Gly	Val	p73beta interference	12917626
280	839	G	C	AGA	ACA	Arg	Thr	Growth advantage	8464896
280	839	G	C	AGA	ACA	Arg	Thr	Downregulation (WAF1); no [regulation (PIG3, GADD45, TAp73, C-JUN)]	17344317
281	841	G	A	GAC	AAC	Asp	Asn	p73beta interference	12917626
281	842	A	G	GAC	GGC	Asp	Gly	Upregulation (ASNS, hTERT)	15077194
281	842	A	G	GAC	GGC	Asp	Gly	TR (ATF3)	17108111
281	842	A	G	GAC	GGC	Asp	Gly	p73 binding; p73 interference	10884390
281	842	A	G	GAC	GGC	Asp	Gly	TA (EGFR, MDR-1)	11803461
281	842	A	G	GAC	GGC	Asp	Gly	TETR+	11803461
281	842	A	G	GAC	GGC	Asp	Gly	TA (PCNA)	9671396
281	842	A	G	GAC	GGC	Asp	Gly	TA (MDR-1); CDDP resistance	12142085
281	842	A	G	GAC	GGC	Asp	Gly	Growth advantage; p73 binding (weak)	15077194
281	842	A	G	GAC	GGC	Asp	Gly	ETO resistance	16260623
281	842	A	G	GAC	GGC	Asp	Gly	ETO resistance	16260623
281	842	A	G	GAC	GGC	Asp	Gly	Daxx interference (moderate)	12482984
281	842	A	G	GAC	GGC	Asp	Gly	Daxx binding (moderate); culture in soft agar (moderate)	12482984
281	842	A	G	GAC	GGC	Asp	Gly	TA (MCM-3, MCM-7)	17982488
281	842	A	G	GAC	GGC	Asp	Gly	TA (MCM-5)	17982488
281	842	A	G	GAC	GGC	Asp	Gly	TA (MDR-1); upregulation (Mdr-1); no [TA(MRP1)]; no [upregulation (Mrp1, Mrp4)]; ETO resistance	11483599
281	842	A	G	GAC	GGC	Asp	Gly	ets-1 binding	11483599
281	842	A	G	GAC	GGC	Asp	Gly	TA (HIV)	8254719
281	842	A	G	GAC	GGC	Asp	Gly	TRANSF+ (moderate)	2288874
281	842	A	G	GAC	GGC	Asp	Gly	TA (C-MYC)	11179471
281	842	A	G	GAC	GGC	Asp	Gly	TA (NFkB2-P2)	16260623
281	842	A	G	GAC	GGC	Asp	Gly	TA (ANGPT1, EBAG-9, ITGA6, Cyclin B2, POLD2, E2F-5)	15492269
281	842	A	G	GAC	GGC	Asp	Gly	Mdm2 stabilization	11152666
281	842	A	G	GAC	GGC	Asp	Gly	MBP1 binding (moderate affinity)	10380882
281	842	A	G	GAC	GGC	Asp	Gly	TA (BAG-1)	10467399
281	842	A	G	GAC	GGC	Asp	Gly	TA (CDC25)	16959611
281	842	A	G	GAC	GGC	Asp	Gly	TA (PCNA); TA (HSV1-UL9, RSV, HTLV); no [TA(CMV)]	1356162
281	842	A	G	GAC	GGC	Asp	Gly	TA (PCNA)	1356162
281	842	A	G	GAC	GGC	Asp	Gly	TA (ASNS, hTERT, SV40)	15077194
281	842	A	G	GAC	GGC	Asp	Gly	hMMP-13 induction	10753945
281	842	A	G	GAC	GGC	Asp	Gly	APO independent of Bcl-2/BAX	12062426
281	842	A	G	GAC	GGC	Asp	Gly	TA (HsMAD1)	11980658
281	842	A	G	GAC	GGC	Asp	Gly	TA (MDR-1)	8099841
281	842	A	G	GAC	GGC	Asp	Gly	TA (MDR-1)	10064694
281	841	G	C	GAC	CAC	Asp	His	DOX, CDDP and 5-FU resistance	17390010
281	841	G	T	GAC	TAC	Asp	Tyr	p73beta interference	12917626
282	845	G	A	CGG	CAG	Arg	Gln	TA (MDR-1)	11920959
282	845	G	A	CGG	CAG	Arg	Gln	p73beta interference	12917626
282	845	G	A	CGG	CAG	Arg	Gln	p73beta interference	12917626
282	845	G	A	CGG	CAG	Arg	Gln	Upregulation (IL-6) moderate; culture in soft agar	11920959
282	845	G	A	CGG	CAG	Arg	Gln	Growth advantage	11920959
282	844	C	G	CGG	GGG	Arg	Gly	p73beta interference	12917626
282	844	C	T	CGG	TGG	Arg	Trp	p73beta interference	12917626
282	844	C	T	CGG	TGG	Arg	Trp	p73 interference; CDDP resistance (moderate)	12726864
282	844	C	T	CGG	TGG	Arg	Trp	p73 interference (moderate); no (CDDP resistance)	12726864
282	844	C	T	CGG	TGG	Arg	Trp	p73 interference	15958617
282	844	C	T	CGG	TGG	Arg	Trp	p73 interference (moderate)	15958617
282	844	C	T	CGG	TGG	Arg	Trp	CDDP resistance; no (GEM, VIN, DOX and ETO resistance); p73 interference	15958617
282	844	C	T	CGG	TGG	Arg	Trp	CDDP resistance; no (GEM, VIN, DOX and ETO resistance); p73 interference	15958617
282	844	C	T	CGG	TGG	Arg	Trp	TRANSF+ (moderate)	7478555
282	844	C	T	CGG	TGG	Arg	Trp	hsc70 binding (weak)	1631137
282	844	C	T	CGG	TGG	Arg	Trp	TA (ASNS, hTERT)	15077194
283	848	G	A	CGC	CAC	Arg	His	p63 and p73 binding (low affinity); p63 and p73 interference (weak); no (hsp70 binding)	11238924
283	848	G	A	CGC	CAC	Arg	His	p73beta interference	12917626
283	848	G	A	CGC	CAC	Arg	His	TRANSF+ (moderate)	10229196
314	941	C	T	TCC	TTC	Ser	Phe	p73beta interference	12917626
337	1009	C	A	CGC	AGC	Arg	Ser	p73beta interference	12917626
